# Supplementary material for: Changes in groundwater drought associated with anthropogenic warming
Source: Copernicus journal article supplement (doi:10.5194/hess-23-1393-2019), 2019-03-11
Supplement: Supplementary file [file hess-23-1393-2019-supplement.pdf]

Supplement of Hydrol. Earth Syst. Sci., 23, 1393–1408, 2019  
<https://doi.org/10.5194/hess-23-1393-2019-supplement>  
© Author(s) 2019. This work is distributed under  
the Creative Commons Attribution 4.0 License.

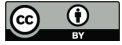

*Supplement of*

## **Changes in groundwater drought associated with anthropogenic warming**

**John P. Bloomfield et al.**

*Correspondence to:* John P. Bloomfield ([jpb@bgs.ac.uk](mailto:jpb@bgs.ac.uk))

The copyright of individual parts of the supplement might differ from the CC BY 4.0 License.

## Supplementary information

### Figures

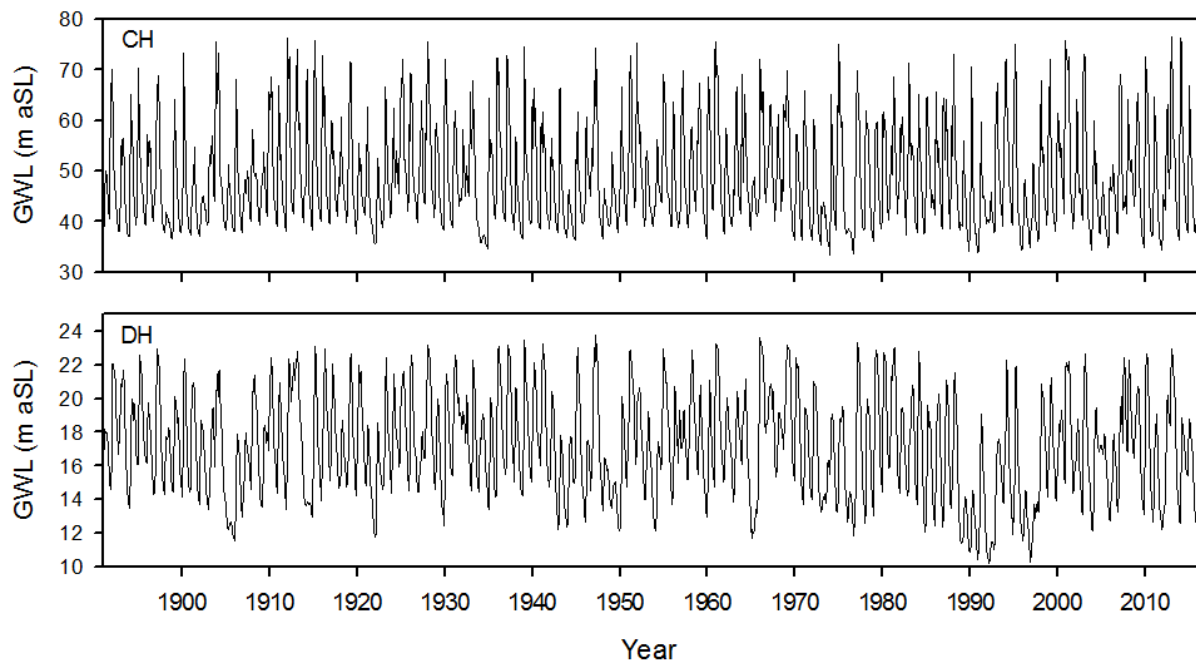

Figure S1. Monthly groundwater levels at CH and DH.

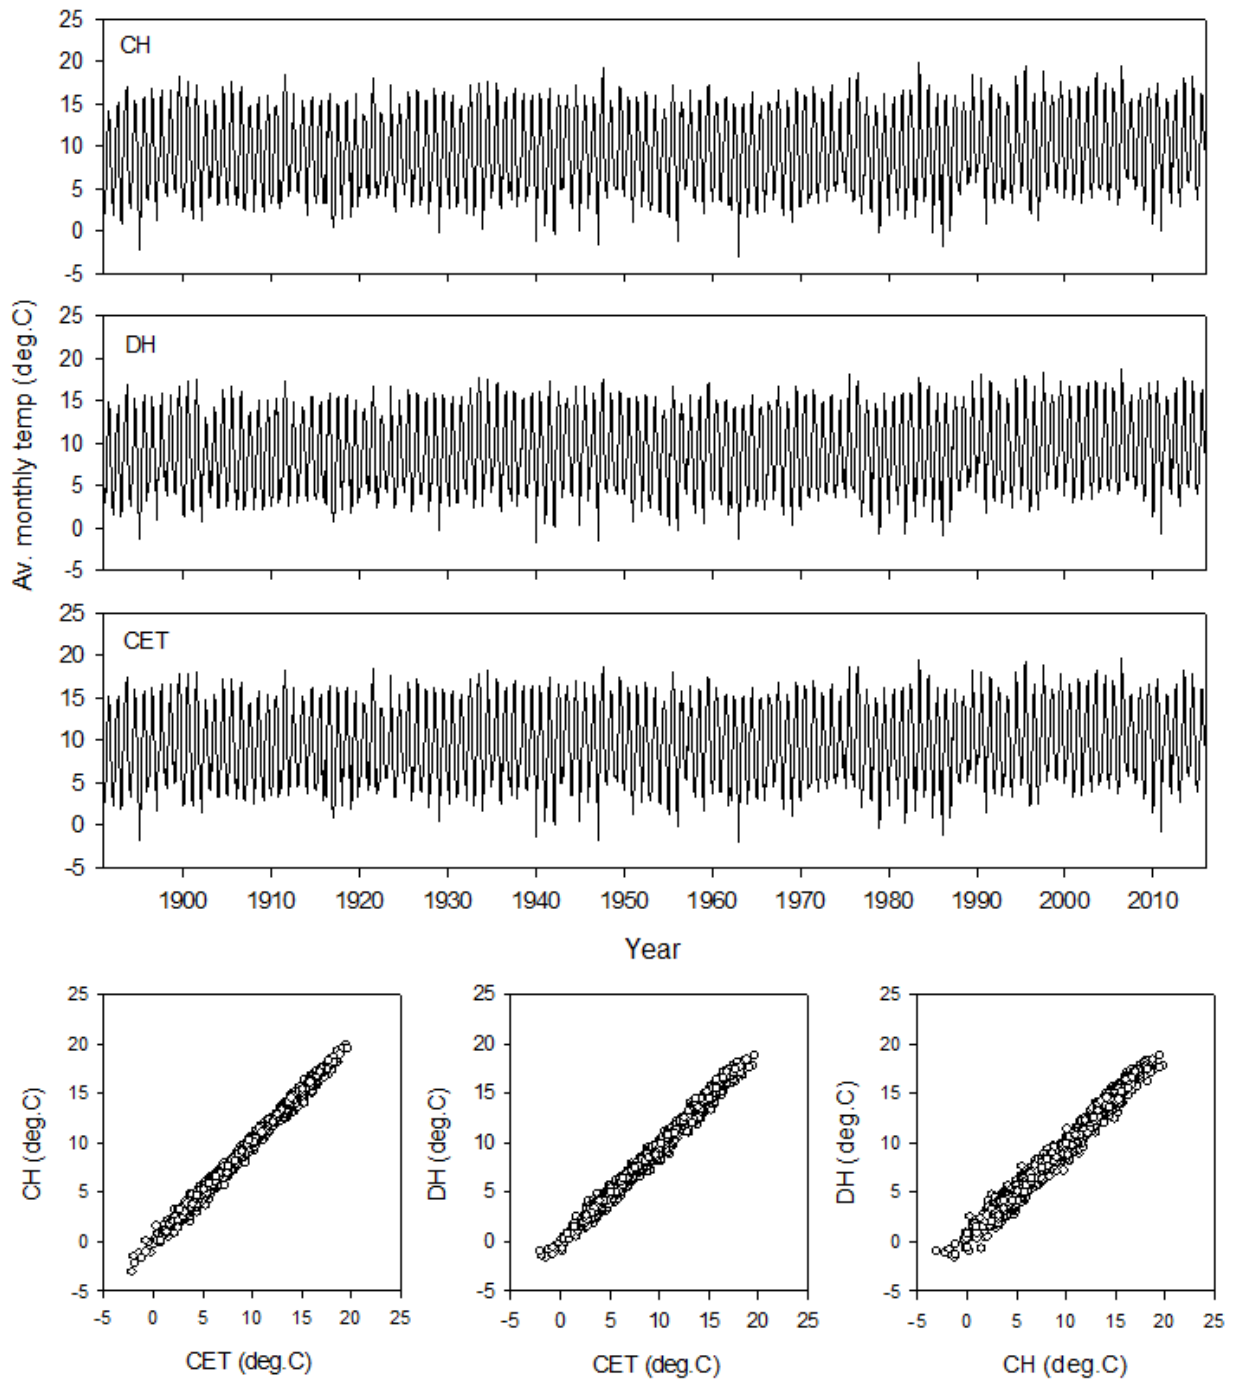

Figure S2. Monthly average air temperature at CH and DH and monthly CET. Cross plots of monthly average air temperature at CH and DH and monthly CET.

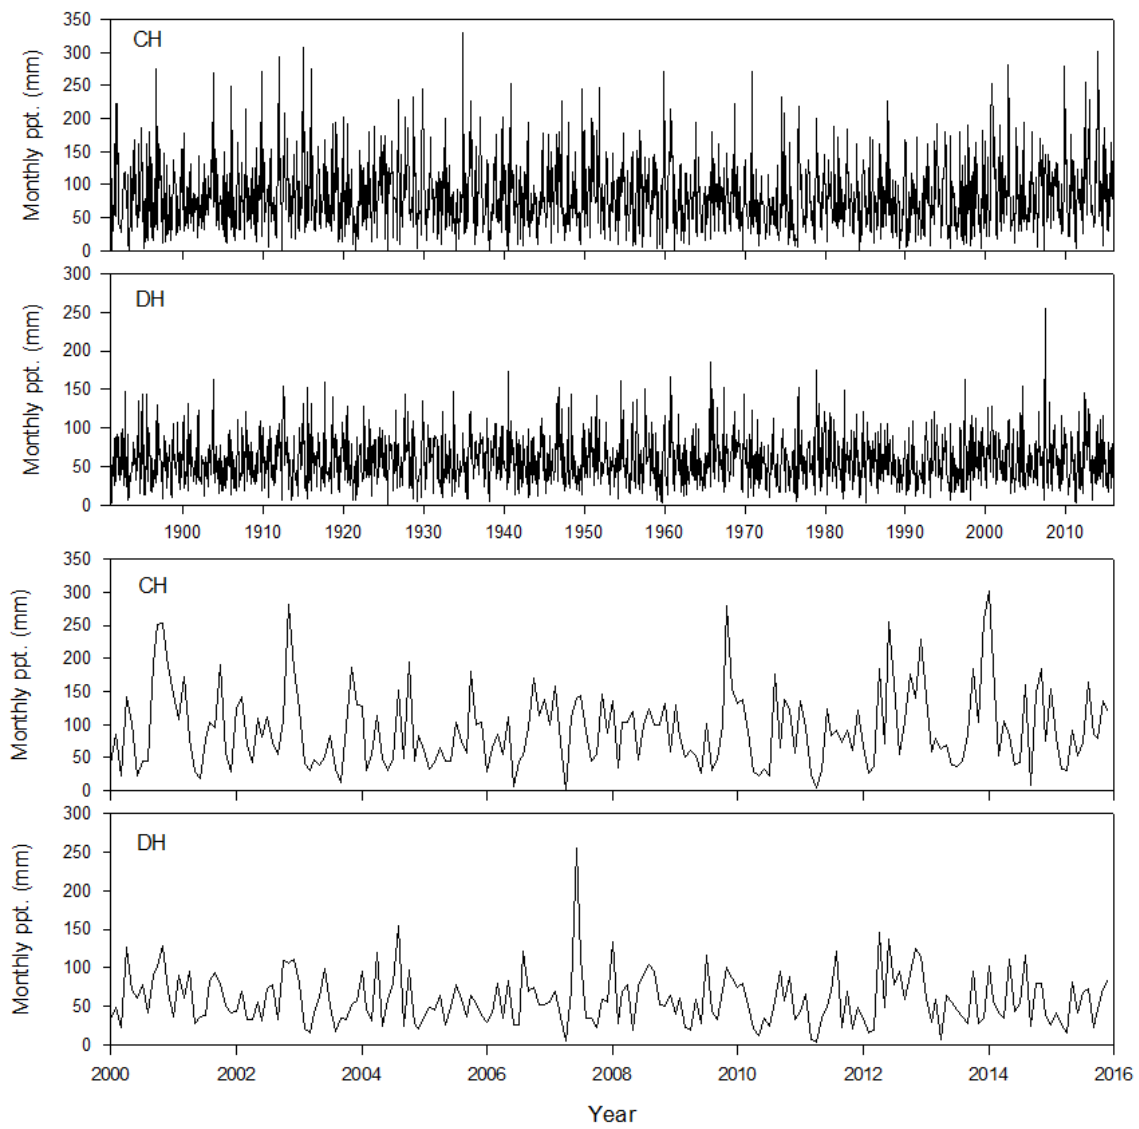

**Figure S3. Monthly total precipitation at CH and DH (for the full observation record from 1891 to 2015 and for the last 15 years of the record).**

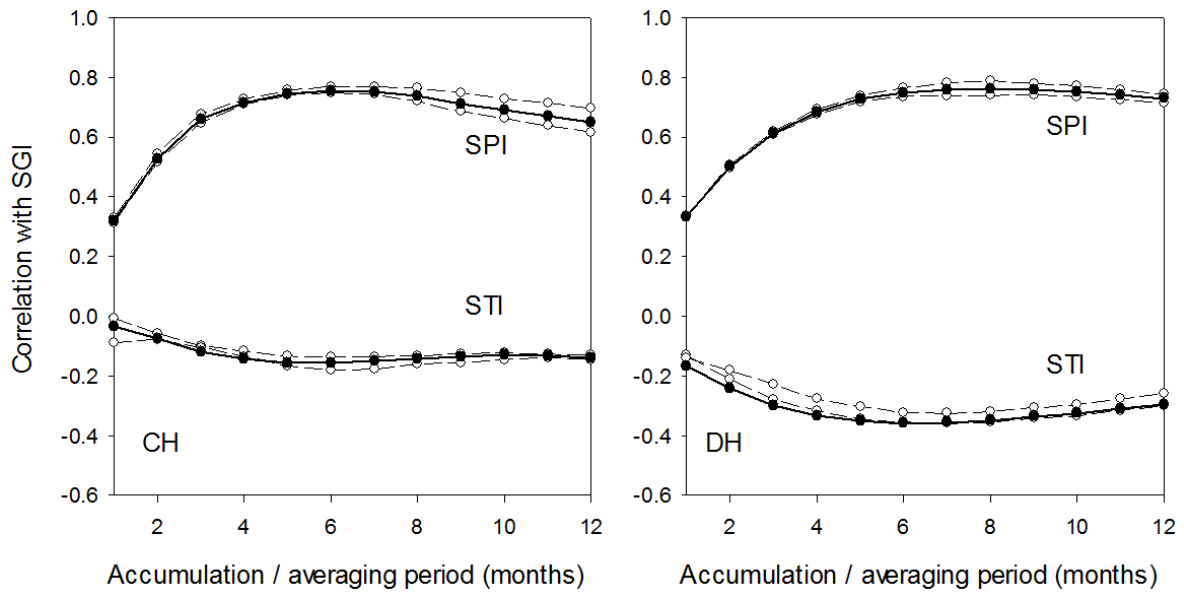

Figure S4. Variation in Pearson correlation coefficient between SGI and SPI for a range of SPI accumulation periods and between SGI and STI for a range of STI averaging periods. Solid lines show the correlation for the entire time series, the dashed lines indicate correlations for first and last third of the record.

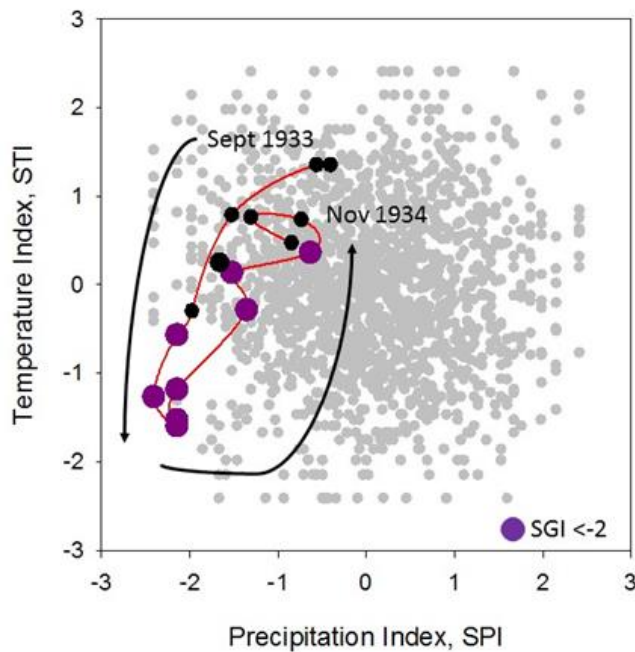

Figure S5. Illustration of variation in SPI and STI during the episode of groundwater drought at CH between September 1933 and November 1934.

## Tables

**Table S1. Percentage of months of SGI, SPI and STI in a given standardised range for the whole record and for each third of the observational record**

| Period    | CH SGI              |            |            |         |          |     | DH SGI              |            |            |         |          |     |
|-----------|---------------------|------------|------------|---------|----------|-----|---------------------|------------|------------|---------|----------|-----|
|           | <=-2                | <=-1 & >-2 | <=-0 & >-1 | >0 & <1 | >=1 & <2 | >=2 | <=-2                | <=-1 & >-2 | <=-0 & >-1 | >0 & <1 | >=1 & <2 | >=2 |
| 1890-2015 | 1.6                 | 14.3       | 33.7       | 34.4    | 14.3     | 1.6 | 1.6                 | 14.3       | 33.7       | 34.4    | 14.3     | 1.6 |
| 1890-1932 | 0.2                 | 10.1       | 36.5       | 37.5    | 13.9     | 1.8 | 0.4                 | 9.5        | 31.7       | 42.1    | 15.3     | 1   |
| 1933-1973 | 1.8                 | 14.6       | 34.3       | 34.3    | 13.6     | 1.2 | 0.2                 | 11.8       | 32.7       | 34.3    | 18.3     | 2.6 |
| 1974-2015 | 2.8                 | 18.3       | 30.2       | 31.4    | 15.5     | 1.8 | 4.2                 | 21.7       | 36.6       | 26.8    | 9.5      | 1.2 |
| Period    | CH SPI <sub>6</sub> |            |            |         |          |     | DH SPI <sub>6</sub> |            |            |         |          |     |
|           | <=-2                | <=-1 & >-2 | <=-0 & >-1 | >0 & <1 | >=1 & <2 | >=2 | <=-2                | <=-1 & >-2 | <=-0 & >-1 | >0 & <1 | >=1 & <2 | >=2 |
| 1890-2015 | 1.6                 | 14.3       | 33.7       | 34.4    | 14.3     | 1.6 | 1.6                 | 14.3       | 33.7       | 34.4    | 14.3     | 1.6 |
| 1890-1932 | 1.6                 | 13.7       | 35.3       | 32.3    | 16.7     | 0.4 | 1.4                 | 12.7       | 31.9       | 39.7    | 13.3     | 1.0 |
| 1933-1973 | 1.2                 | 17.9       | 33.5       | 33.7    | 12.6     | 1.0 | 1.4                 | 13.4       | 33.5       | 31.7    | 17.3     | 2.6 |
| 1974-2015 | 2.0                 | 11.5       | 32.2       | 37.2    | 13.7     | 3.4 | 2.0                 | 16.9       | 35.6       | 31.8    | 12.5     | 1.2 |
| Period    | CH STI <sub>6</sub> |            |            |         |          |     | DH STI <sub>6</sub> |            |            |         |          |     |
|           | <=-2                | <=-1 & >-2 | <=-0 & >-1 | >0 & <1 | >=1 & <2 | >=2 | <=-2                | <=-1 & >-2 | <=-0 & >-1 | >0 & <1 | >=1 & <2 | >=2 |
| 1890-2015 | 1.6                 | 14.3       | 33.7       | 34.4    | 14.3     | 1.6 | 1.6                 | 14.3       | 33.7       | 34.4    | 14.3     | 1.6 |
| 1890-1932 | 0                   | 4.8        | 29         | 42.1    | 21.8     | 2.4 | 0                   | 2.4        | 22.0       | 46.2    | 26.0     | 3.4 |
| 1933-1973 | 0                   | 8.5        | 38.4       | 34.8    | 16.5     | 1.8 | 0.6                 | 10.4       | 42.7       | 31.5    | 13.4     | 1.4 |
| 1974-2015 | 4.6                 | 29.6       | 36.0       | 24.3    | 4.8      | 0.6 | 4.2                 | 30.2       | 38.8       | 23.3    | 3.6      | 0   |

**Table S2. Percentage of groundwater drought months associated with  $SPI \leq -1$ ,  $STI \geq 1$ , and  $SPI \leq -1$  and  $STI \geq 1$  for three time periods and for CH and DH.**

| Period    | CH            |              |                              | DH            |              |                              |
|-----------|---------------|--------------|------------------------------|---------------|--------------|------------------------------|
|           | $SPI \leq -1$ | $STI \geq 1$ | $SPI \leq -1$ & $STI \geq 1$ | $SPI \leq -1$ | $STI \geq 1$ | $SPI \leq -1$ & $STI \geq 1$ |
| 1890-1932 | 67.3%         | 7.7%         | 7.7%                         | 66.0%         | 10.0%        | 10.0%                        |
| 1933-1973 | 69.1%         | 11.1%        | 6.2%                         | 49.2.0%       | 26.4%        | 6.8%                         |
| 1974-2015 | 48.1%         | 48.1%        | 34.0%                        | 51.5%         | 43.1%        | 34.6%                        |

**Table S3. Summary statistics for episodes of groundwater drought at CH and DH**

| Site & period | Total no. drought episodes | No. episodes where SGI intensity $< -1$ | Average duration of all episodes (months) | Average SGI magnitude of all episodes | Average SGI intensity of all episodes | Average SPI of all episodes | Average STI of all episodes |
|---------------|----------------------------|-----------------------------------------|-------------------------------------------|---------------------------------------|---------------------------------------|-----------------------------|-----------------------------|
| CH            |                            |                                         |                                           |                                       |                                       |                             |                             |
| 1891-2015     | 45                         | 16                                      | 10.7                                      | -10.6                                 | -0.89                                 | -0.73                       | 0.10                        |
| 1891-1932     | 12                         | 2                                       | 10.8                                      | -9.8                                  | -0.81                                 | -0.88                       | -0.44                       |
| 1933-1973     | 14                         | 5                                       | 11.9                                      | -11.5                                 | -0.77                                 | -0.70                       | -0.24                       |
| 1974-2015     | 19                         | 9                                       | 9.7                                       | -10.9                                 | -1.02                                 | -0.65                       | 0.68                        |
| DH            |                            |                                         |                                           |                                       |                                       |                             |                             |
| 1891-2015     | 33                         | 9                                       | 16.2                                      | -15.6                                 | -0.84                                 | -0.70                       | 0.24                        |
| 1891-1932     | 9                          | 2                                       | 14.0                                      | -12.3                                 | -0.79                                 | -0.93                       | -0.21                       |
| 1933-1973     | 8                          | 3                                       | 17.2                                      | -15.3                                 | -0.88                                 | -0.88                       | 0.03                        |
| 1974-2015     | 16                         | 4                                       | 17.0                                      | -17.6                                 | -0.85                                 | -0.55                       | 0.60                        |
